# Supplementary material
Source: publisher figshare collection journal article supplement (https://sage.figshare.com/ndownloader/files/22670225)
Supplement: Supplementary file 1 [file 22670225]

**Using Virtual Reality to Compare Design Alternatives Using Subjective and Objective Evaluation Methods**

**Authors:** Wingler, D., Joseph, A., Bayramzadeh, S., Robb, A.

**Course ID #** HERD79

| Full Name | AIA # / EDAC # | Email | Phone # |
|-----------|----------------|-------|---------|
|           |                |       |         |

**Learning Objective 1:** Learn how VR can support an evidence-based design process.

**Learning Objective 2:** Discover how VR can be used to provide objective data that is complimentary to subjective user insights.

**Learning Objectives 3:** Understand the benefits and challenges to using VR to conduct scenario-based simulation evaluations.

**Learning Objective 4:** Learn how VR can be leveraged to effectively evaluate multiple design options.

**Question 1:** VR can be a viable method for collecting both subjective and objective insights of a user's response to a simulated healthcare environment.

- a. True
- b. False

**Question 2:** VR can support clinically relevant structured scenario-based simulations.

- a. True
- b. False

**Question 3:** Data gathered through the VR platform can completely address all design characteristics.

- a. True
- b. False

To earn AIA continuing education units please complete form, and email Jill Glaser at [jglaser@healthdesign.org](mailto:jglaser@healthdesign.org) and your credits will be uploaded to your AIA account. To earn EDAC continuing education units please complete the form, retain the form for your records and self-submit the credits at the time of your EDAC renewal. The form is your "proof of attendance."
